# Supplementary material
Source: HighWire-hosted journal article supplement (http://www.cmaj.ca/highwire/filestream/59084/field_highwire_adjunct_files/2/image-disaverio-2-at.pdf)
Supplement: image-disaverio-2-at.pdf [file image-disaverio-2-at.pdf]

## Appendix 2: References

1. Luketich JD, Raja S, Fernando HC, et al. Laparoscopic repair of giant paraesophageal hernia: 100 consecutive cases. *Ann Surg* 2000;232:608-18.
2. Yang J, Logan J. A data mining and survey study on diseases associated with paraesophageal hernia. *AMIA Annu Symp Proc* 2006;829-33.
3. Stylopoulos NG, Gazelle GS, Rattner DW. Paraesophageal hernias: operation or observation? *Ann Surg* 2002;236:492-500.
4. Kohn GP, Price RR, Demeester SR, et al., SAGES Guidelines Committee. *Guidelines for the management of hiatal hernia*. Los Angeles (CA): Society of American Gastrointestinal and Endoscopic Surgeons; 2013. Available: [www.sages.org/publications/guidelines/guidelines-for-the-management-of-hiatal-hernia](http://www.sages.org/publications/guidelines/guidelines-for-the-management-of-hiatal-hernia) (accessed 2013 Sep. 25).
5. Bhayani NH, Kurian AA, Sharata AM, et al. Wait only to resuscitate: early surgery for acutely presenting paraesophageal hernias yields better outcomes. *Surg Endosc* 2013;27:267-71.
6. Parker DM, Rambhajan A, Johanson K, et al. Urgent laparoscopic repair of acutely symptomatic PEH is safe and effective. *Surg Endosc* 2013;27:4081-6.
